# Supplementary figures and images for: Production of high molecular-ordered stilbene oligomers for the study of their biological activity: total synthesis, bio-catalyzed synthesis and production by plant systems
Source: Royal Society of Chemistry journal article supplement (doi:10.1039/d2np00073c), 2023-01-01

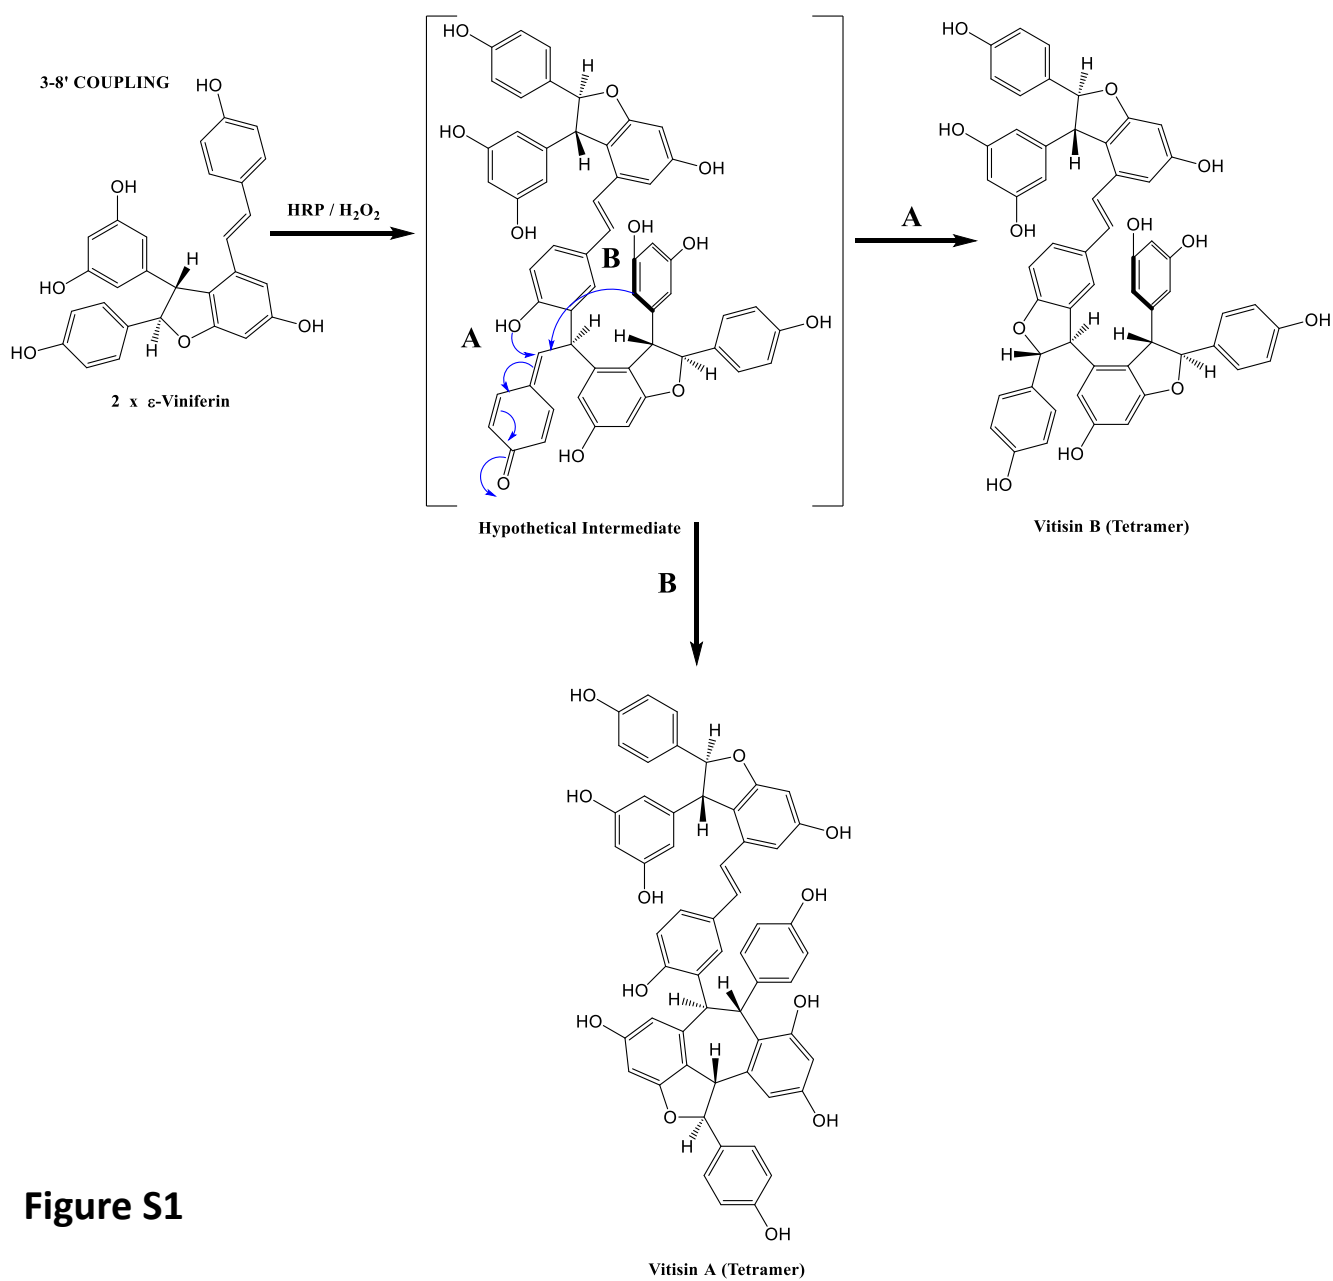

**Figure S1**

Supplement: d2np00073c1.pdf [file d2np00073c1.pdf]

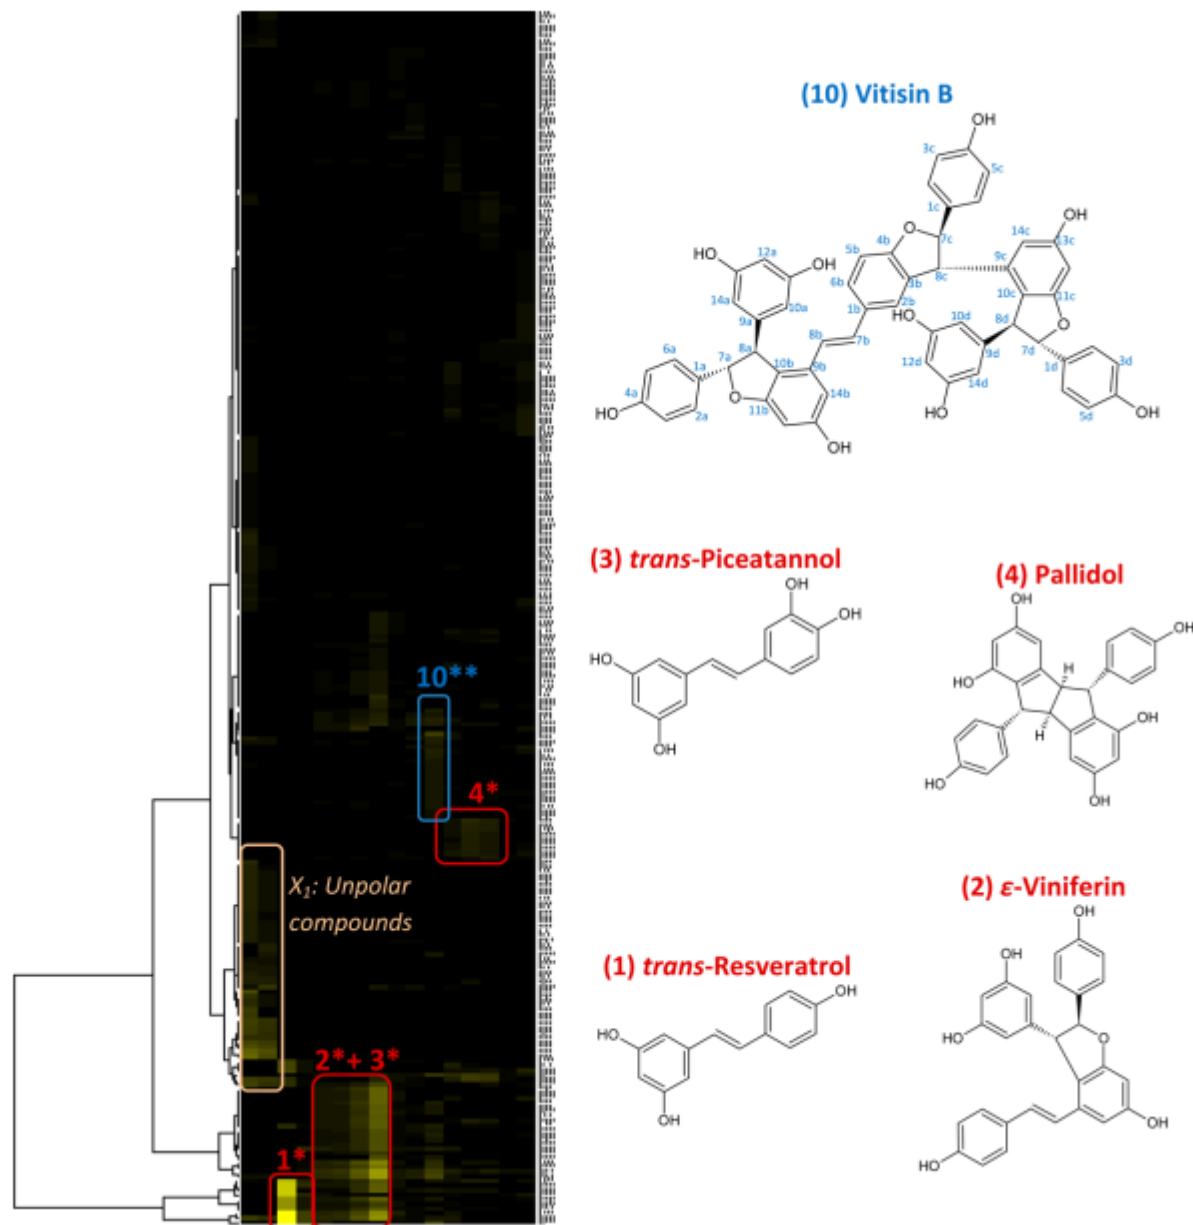

Figure S2

Supplement: d2np00073c2.pdf [file d2np00073c2.pdf]

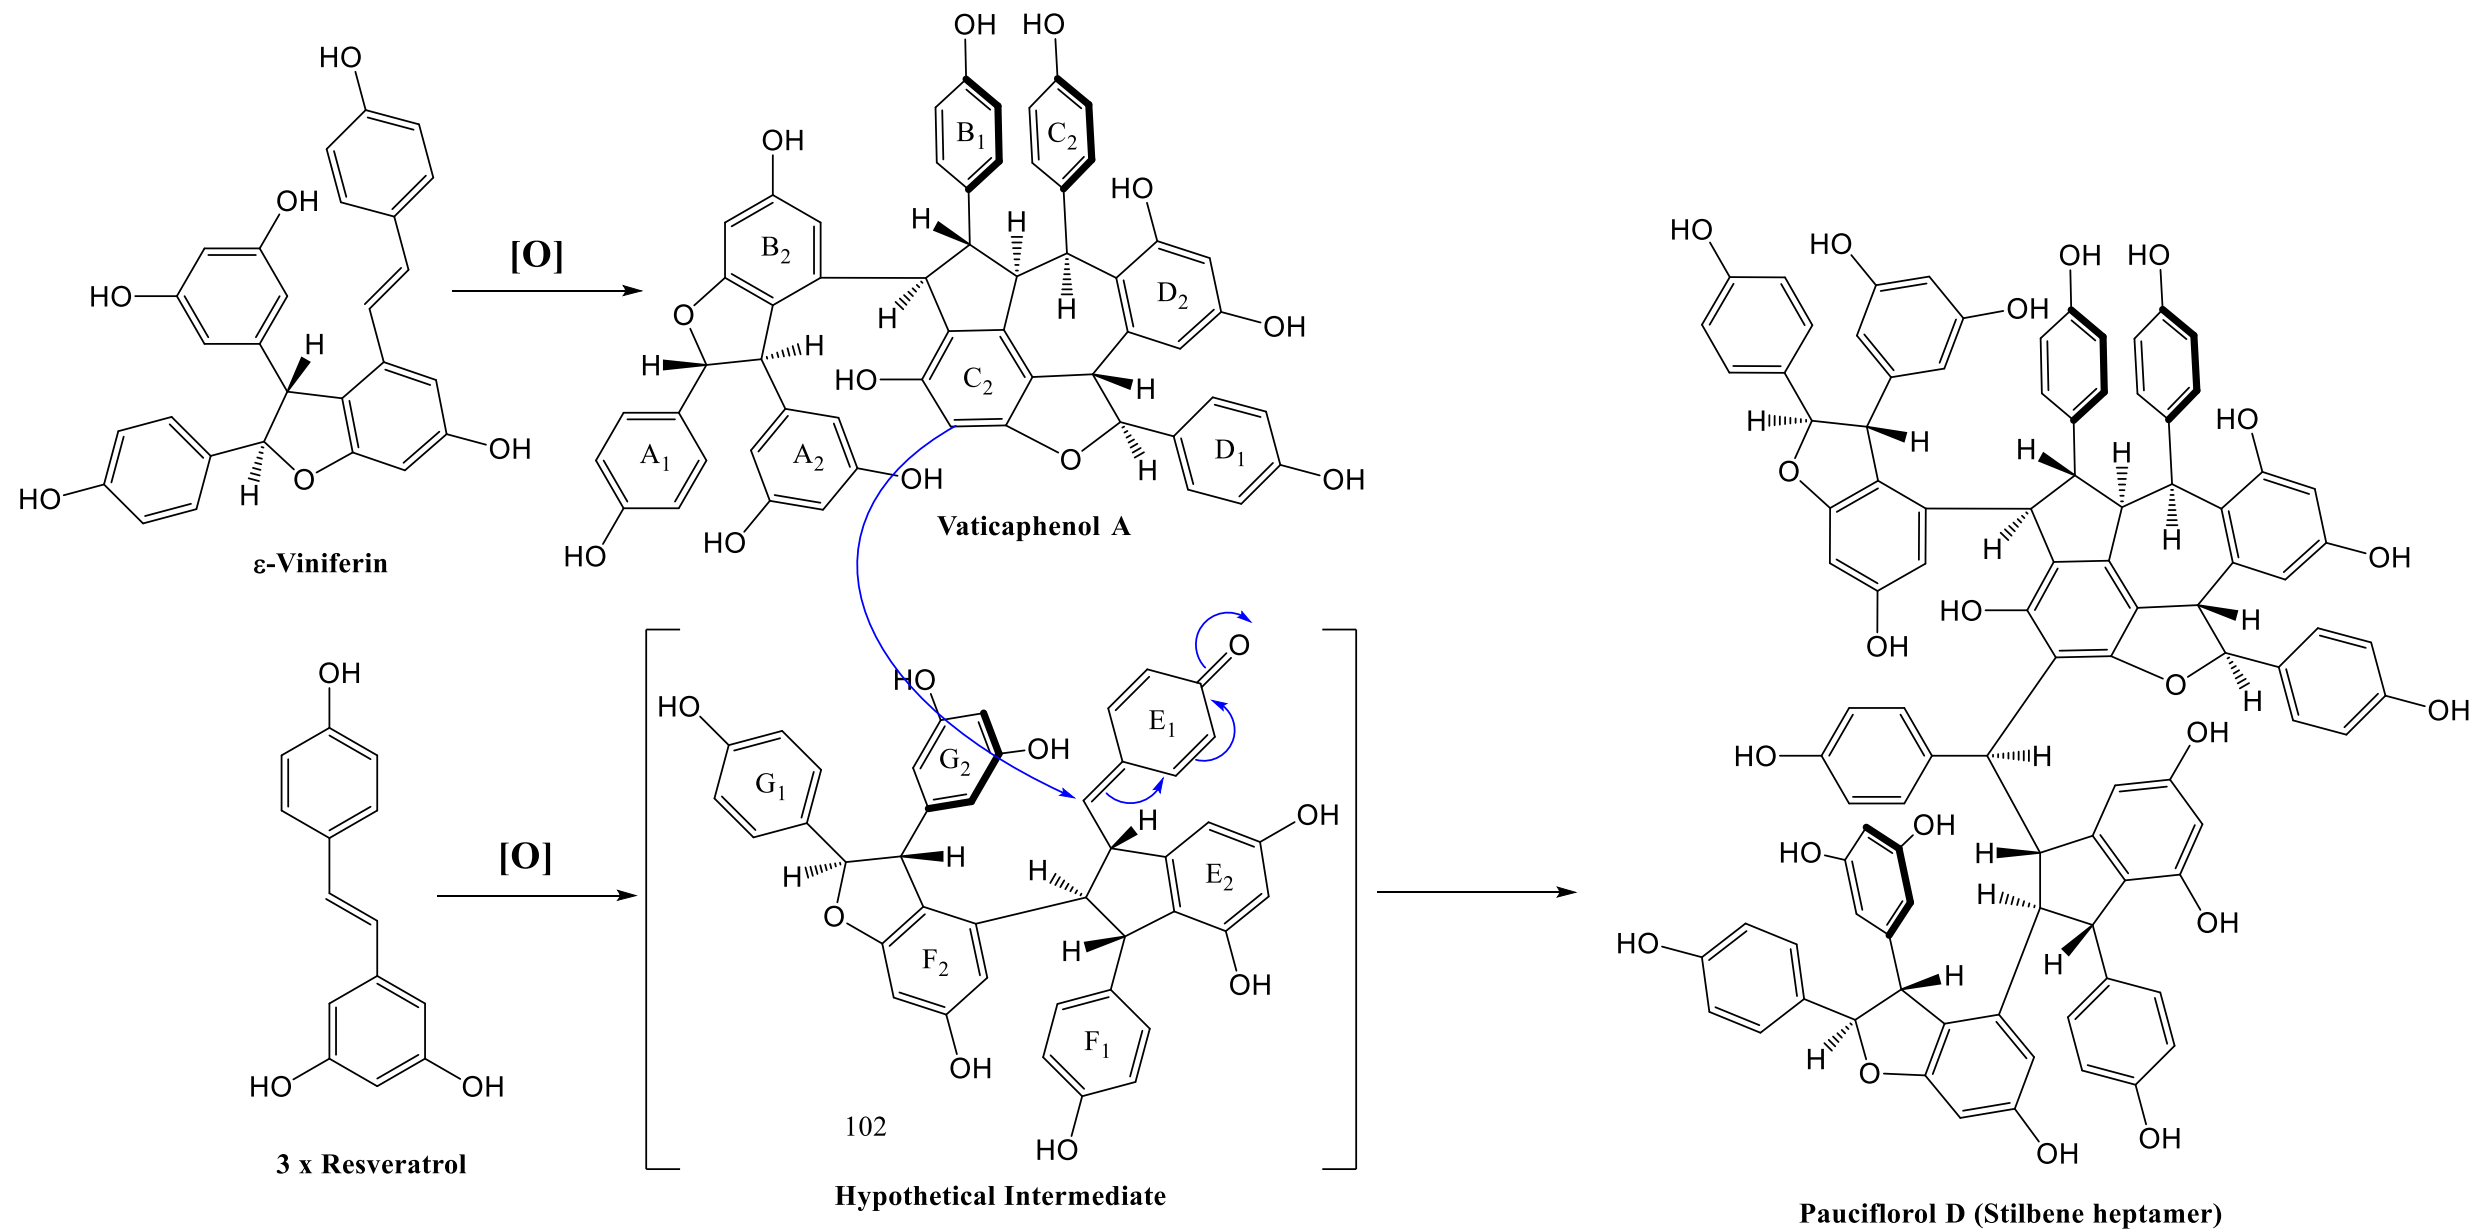

Figure S3

Supplement: d2np00073c3.pdf [file d2np00073c3.pdf]
